# Supplementary material for: Two New Species of Filamentous Sulfur Bacteria of the Genus Thiothrix, Thiothrix winogradskyi sp. nov. and ‘Candidatus Thiothrix sulfatifontis’ sp. nov
Source: MDPI journal article supplement (doi:10.3390/microorganisms10071300), 2022-06-27
Supplement: s1 [file s1]

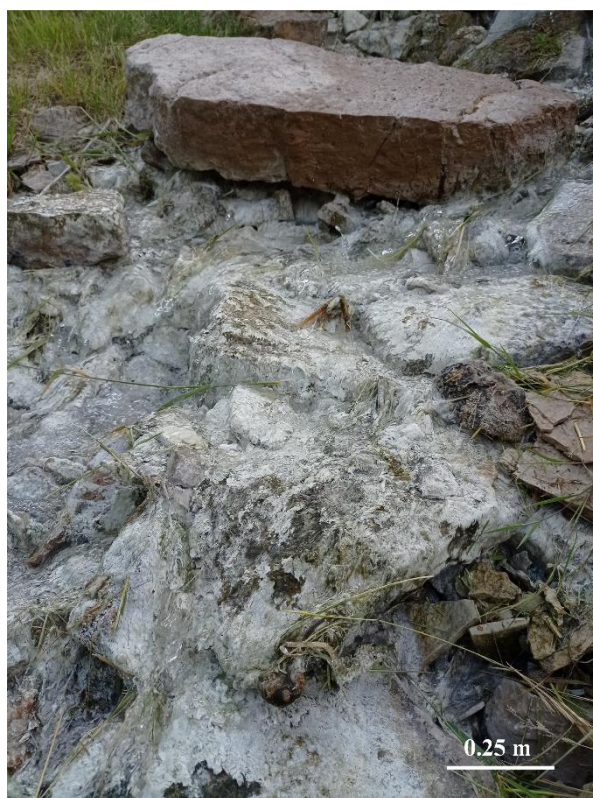

**Figure S1.** Bacterial mats of *Thiothrix* in the hydrogen sulfide spring "Sероводородный" in Tatarstan, Russia.

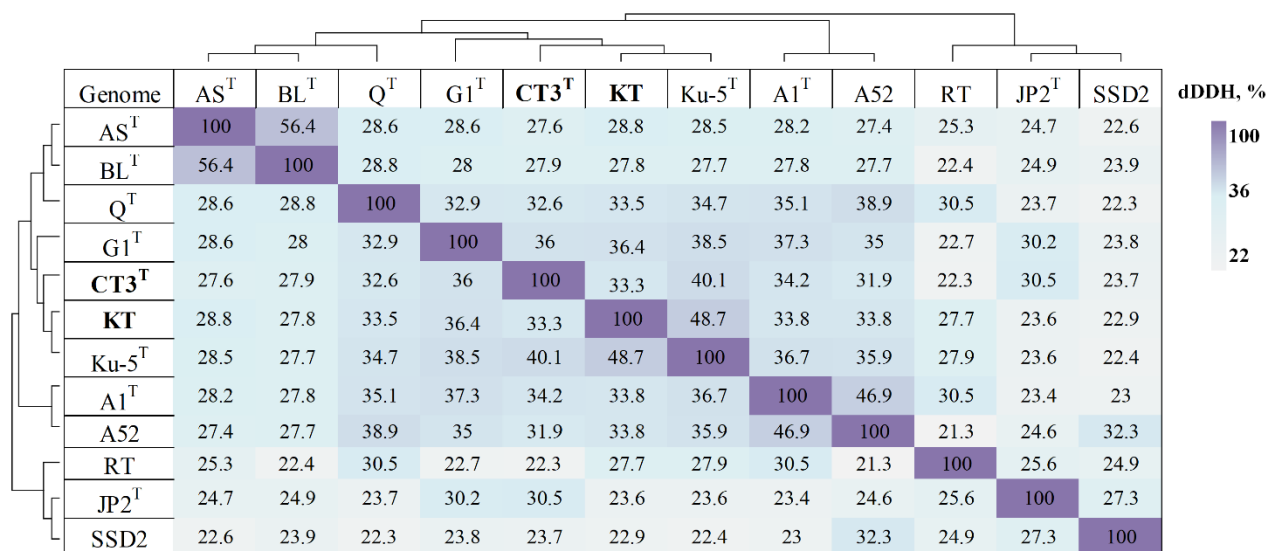

**Figure S2.** dDDH pairwise values for *Thiothrix* genomes. *T. lacustris* BL<sup>T</sup>, (GCF\_000621325.1); *T. litoralis* AS<sup>T</sup> (GCF\_017901135.1); *T. subterranea* Ku-5<sup>T</sup> (GCF\_016772315.1); MAG of *Thiothrix* sp. KT (GCA\_022828425.1); *T. caldifontis* G1<sup>T</sup> (GCF\_900107695.1); *Thiothrix* sp. CT3 (GCA\_021650935.1); *T. fructosivorans* Q<sup>T</sup> (GCA\_017349355.1); *T. unzii* A1<sup>T</sup> (GCA\_017901175.1); MAG of *Thiothrix* sp. A2; MAG of *Thiothrix* sp. A52 (GCF\_017901155.1); ‘*Ca. Thiothrix moscowensis*’ RT (GCA\_016292235.1); *T. nivea* JP2<sup>T</sup> (GCF\_000260135.1); ‘*Ca. Thiothrix singaporensis*’ SSD2 (GCA\_013693955.1).

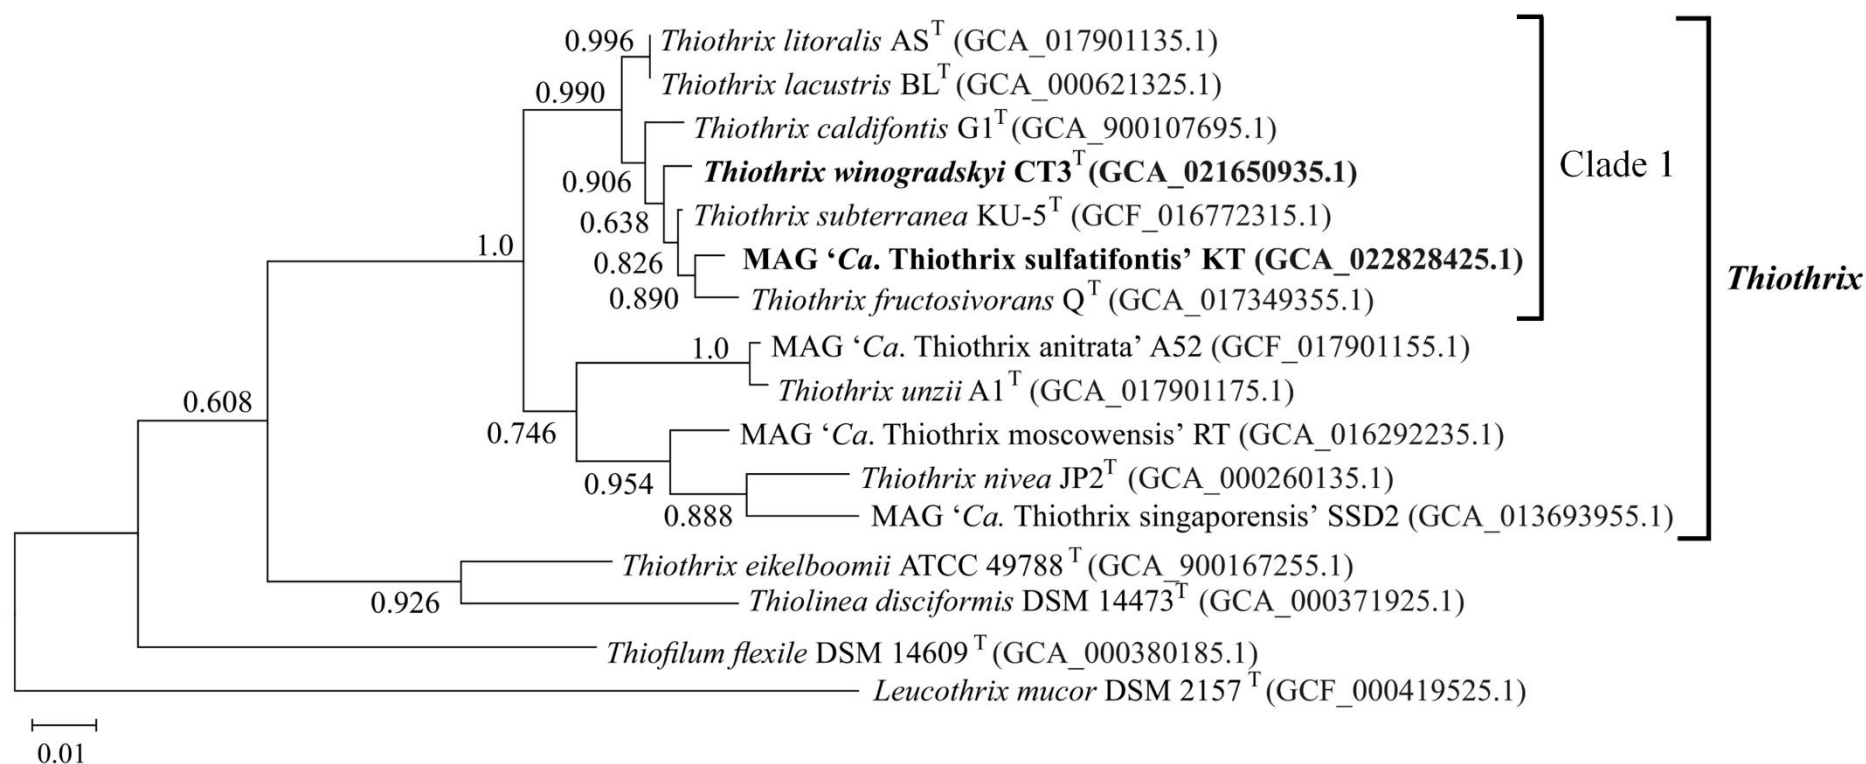

**Figure S3.** 16S rRNA gene-based maximum-likelihood phylogenetic tree of type strains of *Thiothrix* species. The 16S rRNA gene sequences extracted from genomes (assembly accession numbers are listed after the genome name) were aligned against the SILVA database using SINA v.1.2.11. The alignment had 1535 positions. The best evolutionary model, HKY+G+I (HKY substitution model, estimated proportion of invariable sites, estimated gamma shape parameter), was defined by jModelTest v.2.1.10 with the Bayesian Information Criterion. The maximum likelihood tree was constructed using PhyML v.3.3 with 500 bootstrap replicates; the Log-likelihood of the tree was -5038.18080. The internal branching support levels are specified at the nodes. The genome of *Leucothrix mucor* DSM 2157<sup>T</sup> was used for tree rooting. Scale, 0.01 substitutions per nucleotide position. Note that *Thiothrix eikelboomii* actually should belong to the genus *Thiolinea* but cannot be reclassified because of its absence in two international collections [3].

Table S1. Genes encoding enzymes of metabolic pathways in ‘*Candidatus* Thiothrix sulfatifontis’ KT and *Thiothrix winogradskyi* CT3<sup>T</sup>.

| Gene              | Predicted function                                               | KT                                        | CT3                                                              |
|-------------------|------------------------------------------------------------------|-------------------------------------------|------------------------------------------------------------------|
|                   |                                                                  | RefSeq (GeneBank) locus_tag               | RefSeq (GeneBank) locus_tag                                      |
| Sulfur metabolism |                                                                  |                                           |                                                                  |
| <i>sqrA</i>       | Sulfide quinone oxidoreductase SqrA (EC 1.8.5.4)                 | L3K52_05845                               | L2Y54_RS07100                                                    |
| <i>sqrF</i>       | Sulfide quinone oxidoreductase SqrF (EC 1.8.5.4)                 | L3K52_13295                               | L2Y54_RS12370<br>L2Y54_RS12360                                   |
| <i>fccB</i>       | Sulfide dehydrogenase (flavocytochrome c) flavoprotein chain     | L3K52_05350<br>L3K52_18375<br>L3K52_10900 | L2Y54_RS06570<br>L2Y54_RS06620<br>L2Y54_RS21270<br>L2Y54_RS15945 |
| <i>fccA</i>       | cytochrome c subunit of flavocytochrome c sulfide dehydrogenase  | L3K52_05185                               | L2Y54_RS06390                                                    |
| <i>soxA</i>       | sulfur oxidation c-type cytochrome SoxA (EC 1.8.2.3 )            | L3K52_01425                               | L2Y54_RS05655<br>L2Y54_RS10175<br>L2Y54_RS11445                  |
| <i>soxZ</i>       | thiosulfate oxidation carrier complex protein SoxZ (EC 1.8.2.6 ) | L3K52_01420<br>L3K52_01435                | L2Y54_RS05660<br>L2Y54_RS10180                                   |
| <i>soxY</i>       | thiosulfate oxidation carrier protein SoxY (EC 1.8.2.6 )         | L3K52_01415<br>L3K52_01430                | L2Y54_RS05665<br>L2Y54_RS10185                                   |
| <i>soxB</i>       | thiosulfohydrolase SoxB (EC 3.1.6.20)                            | L3K52_01470                               | L2Y54_RS05615                                                    |
| <i>soxX</i>       | sulfur oxidation c-type cytochrome SoxX (EC 1.8.2.3 )            | L3K52_01410                               | L2Y54_RS05670<br>L2Y54_RS10170<br>L2Y54_RS11440                  |
| <i>soeA</i>       | sulfite dehydrogenase (quinone) subunit SoeA (EC 1.8.5.6)        | L3K52_02785                               | L2Y54_RS04105                                                    |
| <i>soeB</i>       | sulfite dehydrogenase (quinone) subunit SoeB (EC 1.8.5.6)        | L3K52_02780                               | L2Y54_RS04110                                                    |
| <i>soeC</i>       | sulfite dehydrogenase (quinone) subunit SoeC (EC 1.8.5.6)        | L3K52_02775                               | L2Y54_RS04115                                                    |

|             |                                                                                          |                            |                                |
|-------------|------------------------------------------------------------------------------------------|----------------------------|--------------------------------|
| <i>aprA</i> | adenylylsulfate reductase, subunit A (EC 1.8.4.10)                                       | L3K52_04580                | L2Y54_RS05790                  |
| <i>aprB</i> | adenylylsulfate reductase, subunit B (EC 1.8.4.10)                                       | L3K52_04575                | L2Y54_RS05785                  |
| <i>sat</i>  | sulfate adenylyltransferase (EC 2.7.7.4)                                                 | L3K52_04570                | L2Y54_RS05780                  |
| <i>dsrA</i> | Dissimilatory sulfite reductase, alpha subunit (EC 1.8.99.5)                             | L3K52_08855                | L2Y54_RS11490                  |
| <i>dsrB</i> | Dissimilatory sulfite reductase, beta subunit (EC 1.8.99.5)                              | L3K52_08860                | L2Y54_RS11495                  |
| <i>dsrE</i> | tRNA 2-thiouridine synthesizing protein D (EC 2.8.1.-)                                   | L3K52_08865                | L2Y54_RS11500                  |
| <i>dsrF</i> | tRNA 2-thiouridine synthesizing protein C (EC 2.8.1.-)                                   | L3K52_08870                | L2Y54_RS11505                  |
| <i>dsrH</i> | tRNA 2-thiouridine synthesizing protein B (EC 2.8.1.-)                                   | L3K52_08875                | L2Y54_RS11510                  |
| <i>dsrC</i> | tRNA 2-thiouridine synthesizing protein E (EC 2.8.1.-)                                   | L3K52_08835<br>L3K52_08880 | L2Y54_RS11470<br>L2Y54_RS11515 |
| <i>dsrM</i> | sulfite reduction-associated complex DsrMKJOP protein DsrM                               | L3K52_08885                | L2Y54_RS11520                  |
| <i>dsrK</i> | sulfite reduction-associated complex DsrMKJOP protein DsrK                               | L3K52_08890                | L2Y54_RS11525                  |
| <i>dsrL</i> | glutamate synthase (NADPH) small chain dsrL/ intracellular sulfur oxidation protein DsrL | L3K52_08895                | L2Y54_RS11530                  |
| <i>dsrJ</i> | Sulfite reduction-associated complex DsrMKJOP multiheme protein DsrJ                     | L3K52_08900                | L2Y54_RS11535                  |
| <i>dsrO</i> | sulfite reduction-associated complex                                                     | L3K52_08905                | L2Y54_RS11540                  |

|                            |                                                            |             |               |
|----------------------------|------------------------------------------------------------|-------------|---------------|
|                            | DsrMKJOP iron-sulfur protein DsrO                          |             |               |
| <i>dsrP</i>                | sulfite reduction-associated complex DsrMKJOP protein DsrP | L3K52_08910 | L2Y54_RS11545 |
| <i>dsrN</i>                | Cobyrinic acid A,C-diamide synthase DsrN (EC 6.3.5.11)     | L3K52_11740 | L2Y54_RS14880 |
| <i>dsrR</i>                | protein involved in sulfur oxidation DsrR                  | L3K52_11745 | L2Y54_RS14875 |
| <i>dsrS</i>                | protein involved in sulfur oxidation DsrS                  | L3K52_11645 | L2Y54_RS14955 |
| <b>Nitrogen metabolism</b> |                                                            |             |               |
| <i>narG</i>                | nitrate reductase alpha subunit (EC 1.7.99.4)              | -           | L2Y54_RS20190 |
| <i>narH</i>                | nitrate reductase beta subunit (EC 1.7.5.1)                | -           | L2Y54_RS20185 |
| <i>narI</i>                | nitrate reductase gamma subunit (EC 1.7.5.1)               | -           | L2Y54_RS20175 |
| <i>narJ</i>                | nitrate reductase delta subunit (EC 1.7.5.1)               | -           | L2Y54_RS20180 |
| <i>nirS</i>                | nitrite reductase (NO-forming) (EC 1.7.2.1)                | -           | L2Y54_RS20045 |
| <i>cnorB</i>               | nitric oxide reductase subunit B (EC 1.7.2.5 )             | -           | L2Y54_RS20040 |
| <i>cnorC</i>               | nitric oxide reductase subunit C (EC 1.7.2.5 )             | -           | L2Y54_RS20035 |
| <i>nirB</i>                | nitrite reductase (NADH) large subunit (EC 1.7.1.1)        | L3K52_06745 | L2Y54_RS07995 |
| <i>nirD</i>                | nitrite reductase (NADH) small subunit (EC 1.7.1.1)        | L3K52_06750 | L2Y54_RS08000 |
| <i>nifA</i>                | Nif-specific regulatory protein NifA                       | L3K52_17530 | -             |
| <i>nifS</i>                | cysteine desulfurase NifS (EC 2.8.1.7)                     | L3K52_17560 | -             |
| <i>nifU</i>                | nitrogen fixation protein NifU and related proteins        | L3K52_17565 | -             |
| <i>nifB</i>                | nitrogen fixation protein NifB                             | L3K52_17615 | -             |

|                              |                                                                      |             |                                |
|------------------------------|----------------------------------------------------------------------|-------------|--------------------------------|
| <i>nifX</i>                  | nitrogen fixation protein NifX                                       | -           | -                              |
| <i>nifX2</i>                 | nitrogen fixation protein NifX2                                      | -           | -                              |
| <i>nifB2</i>                 | nitrogen fixation protein NifB2                                      | L3K52_12300 | -                              |
| <i>nifY</i>                  | nitrogen fixation-related protein, gamma subunit                     | -           | -                              |
| <i>nifE</i>                  | nitrogenase molybdenum-cofactor synthesis protein NifE (EC 1.18.6.1) | L3K52_08140 | -                              |
| <i>nifN</i>                  | nitrogenase molybdenum-iron protein NifN (EC 1.18.6.1.)              | L3K52_08145 | -                              |
| <i>nifQ</i>                  | nitrogen fixation protein NifQ                                       | L3K52_17585 | -                              |
| <i>nifV</i>                  | homocitrate synthase NifV (EC 2.3.3.14)                              | L3K52_08110 | -                              |
| <i>nifW</i>                  | nitrogen fixation protein NifW                                       | L3K52_08070 | -                              |
| <i>nifM</i>                  | nitrogen fixation protein NifM                                       | L3K52_08060 | -                              |
| <i>nifH</i>                  | nitrogenase iron protein NifH (EC 1.18.6.1)                          | -           | -                              |
| <i>nifD</i>                  | nitrogenase molybdenum-iron protein alpha chain (EC 1.18.6.1)        | -           | -                              |
| <i>nifK</i>                  | nitrogenase molybdenum-iron protein beta chain (EC 1.18.6.1)         | -           | -                              |
| <i>nifZ</i>                  | nitrogen fixation protein NifZ                                       | L3K52_08065 | -                              |
| <i>nifT</i>                  | nitrogen fixation protein NifT                                       | -           | -                              |
| <i>nifO</i>                  | NifO                                                                 | L3K52_17600 | -                              |
| <i>nasA</i>                  | assimilatory nitrate reductase catalytic subunit                     | L3K52_06755 | L2Y54_RS08005                  |
| <b>Phosphorus metabolism</b> |                                                                      |             |                                |
| <i>phoU</i>                  | phosphate transport system protein PhoU                              | L3K52_14400 | L2Y54_RS13770<br>L2Y54_RS13790 |

|                                                                    |                                                                            |                                                          |                                                 |
|--------------------------------------------------------------------|----------------------------------------------------------------------------|----------------------------------------------------------|-------------------------------------------------|
| <i>phoR</i>                                                        | Phosphate regulon sensor protein<br>PhoR (EC 2.7.13.3)                     | L3K52_14410                                              | L2Y54_RS13780                                   |
| <i>phoB</i>                                                        | Phosphate regulon transcriptional regulatory protein<br>PhoB (EC 2.7.13.3) | L3K52_14170<br>L3K52_14405                               | L2Y54_RS12815<br>L2Y54_RS13775                  |
| <i>pstS</i>                                                        | phosphate transport system permease protein PstS                           | L3K52_00885<br>L3K52_11775<br>L3K52_14215<br>L3K52_14360 | L2Y54_RS10225<br>L2Y54_RS13730<br>L2Y54_RS14835 |
| <i>pstA</i>                                                        | phosphate transport system permease protein PstA (EC 7.3.2.1)              | L3K52_14390                                              | L2Y54_RS13760                                   |
| <i>pstC</i>                                                        | phosphate transport system permease protein PstC (EC 7.3.2.1)              | L3K52_14385                                              | L2Y54_RS13755                                   |
| <i>pstB</i>                                                        | pstA; phosphate transport system permease protein PstB (EC 7.3.2.1)        | L3K52_14395                                              | L2Y54_RS13765                                   |
| <i>ppkI</i>                                                        | polyphosphate kinase (EC 2.7.4.1)                                          | L3K52_16915                                              | L2Y54_RS19505                                   |
| <i>epp</i>                                                         | Exopolyphosphatase (EC 3.6.1.11)                                           | L3K52_01755                                              | L2Y54_RS05070                                   |
| <b>Emden-Meyerhof (EM) pathway and Calvin-Benson-Bassham cycle</b> |                                                                            |                                                          |                                                 |
| <i>glk</i>                                                         | Glucokinase (EC 2.7.1.2)                                                   | L3K52_02195                                              | L2Y54_RS04615                                   |
| <i>pgi</i>                                                         | glucose-6-phosphate isomerase (EC 5.3.1.9)                                 | L3K52_02200                                              | L2Y54_RS04610                                   |
| <i>pfk</i>                                                         | 6-phosphofructokinase (EC 2.7.1.11)                                        | L3K52_04600                                              | L2Y54_RS05810                                   |
| <i>fbaA</i>                                                        | fructose-bisphosphate aldolase class II (EC 4.1.2.13)                      | L3K52_04730                                              | L2Y54_RS05940                                   |
| <i>tpiA</i>                                                        | triosephosphate isomerase (EC 5.3.1.1)                                     | L3K52_08945                                              | L2Y54_RS11580                                   |
| <i>gapA</i>                                                        | NAD-dependent glyceraldehyde-3-phosphate dehydrogenase (EC 1.2.1.12)       | L3K52_04880<br>L3K52_04715                               | L2Y54_RS01965<br>L2Y54_RS10245<br>L2Y54_RS05925 |
| <i>pgk</i>                                                         | Phosphoglycerate kinase (EC 2.7.2.3)                                       | L3K52_04720                                              | L2Y54_RS05930                                   |



|                              |                                                                                              |                            |                                |
|------------------------------|----------------------------------------------------------------------------------------------|----------------------------|--------------------------------|
| <i>gpmI</i>                  | 2,3-bisphosphoglycerate-independent phosphoglycerate mutase (EC 5.4.2.1)                     | L3K52_04765                | L2Y54_RS02070                  |
| <i>eno</i>                   | Enolase (EC 4.2.1.11)                                                                        | L3K52_10575                | L2Y54_RS12835                  |
| <i>pyk</i>                   | Pyruvate kinase (EC 2.7.1.40)                                                                | L3K52_14355<br>L3K52_04725 | L2Y54_RS13725<br>L2Y54_RS05935 |
| <i>porA</i>                  | pyruvate ferredoxin oxidoreductase alpha subunit [EC:1.2.7.1]                                | L3K52_02800                | L2Y54_RS04055                  |
| <i>porB</i>                  | pyruvate ferredoxin oxidoreductase beta subunit [EC:1.2.7.1]                                 | L3K52_02805                | L2Y54_RS04050                  |
| <i>porC</i> ,<br><i>porG</i> | pyruvate ferredoxin oxidoreductase gamma subunit [EC:1.2.7.1]                                | L3K52_02795                | L2Y54_RS04060                  |
| <i>aceE</i>                  | Pyruvate dehydrogenase E1 component (EC 1.2.4.1)                                             | L3K52_14985                | L2Y54_RS17170<br>L2Y54_RS04245 |
| <i>pdhC</i>                  | Dihydrolipoamide acetyltransferase component of pyruvate dehydrogenase complex (EC 2.3.1.12) | L3K52_14980                | L2Y54_RS17165<br>L2Y54_RS04240 |
| <i>pdhD</i>                  | Dihydrolipoamide dehydrogenase of pyruvate dehydrogenase complex (EC 1.8.1.4)                | L3K52_14975                | L2Y54_RS17160                  |
|                              |                                                                                              | L3K52_10195                | L2Y54_RS04235                  |
| <i>rpiA</i>                  | Ribose-5-phosphate isomerase A (EC 5.3.1.6)                                                  | L3K52_05760                | L2Y54_RS06975                  |
| <i>rpe</i>                   | Ribulose-phosphate 3-epimerase (EC 5.1.3.1)                                                  | L3K52_15085                | L2Y54_RS17270                  |
| <i>tktA</i>                  | Transketolase (EC 2.2.1.1)                                                                   | L3K52_04710                | L2Y54_RS05920                  |
| <i>fbp</i>                   | Fructose-1,6-bisphosphatase, type I (EC 3.1.3.11)                                            | L3K52_03050                | L2Y54_RS03730                  |

|                                                                                         |                                                                         |                                           |                                                 |
|-----------------------------------------------------------------------------------------|-------------------------------------------------------------------------|-------------------------------------------|-------------------------------------------------|
| <i>rbcL</i>                                                                             | Ribulose<br>biphosphate<br>carboxylase large<br>chain (EC 4.1.1.39)     | L3K52_12120<br>L3K52_00755<br>L3K52_15820 | L2Y54_RS00875<br>L2Y54_RS01010                  |
| <i>rbcS</i>                                                                             | Ribulose<br>biphosphate<br>carboxylase small<br>chain (EC 4.1.1.39)     | L3K52_00760<br>L3K52_15825                | L2Y54_RS01015                                   |
| <i>prkB</i>                                                                             | Phosphoribulokinase<br>(EC 2.7.1.19)                                    | L3K52_10935<br>L3K52_04410                | L2Y54_RS02325<br>L2Y54_RS15920                  |
| <b>Tricarboxylic acid (TCA) cycle, glyoxylate cycle and a way to anabolism from TCA</b> |                                                                         |                                           |                                                 |
| <i>gltA</i>                                                                             | Citrate synthase (si)<br>(EC 2.3.3.1)                                   | L3K52_10210                               | L2Y54_RS16985                                   |
| <i>acnB</i>                                                                             | Aconitate hydratase 2<br>(EC 4.2.1.3)                                   | L3K52_10215                               | L2Y54_RS16980                                   |
| <i>idh</i>                                                                              | Isocitrate<br>dehydrogenase<br>(NADP) (EC<br>1.1.1.42)                  | L3K52_12060                               | L2Y54_RS14605<br>L2Y54_RS18995<br>L2Y54_RS06290 |
| <i>sucA</i>                                                                             | 2-oxoglutarate<br>dehydrogenase E1<br>component (EC<br>1.2.4.2)         | L3K52_13190<br>L3K52_11440                | L2Y54_RS18995<br>L2Y54_RS06290                  |
| <i>sucB</i>                                                                             | 2-oxoglutarate<br>dehydrogenase E2<br>complex (EC<br>2.3.1.61)          | L3K52_10190                               | L2Y54_RS12490                                   |
| <i>sucD</i>                                                                             | Succinyl-CoA ligase<br>(ADP-forming) alpha<br>chain (EC 6.2.1.5)        | L3K52_10205                               | L2Y54_RS13255                                   |
| <i>sucC</i>                                                                             | Succinyl-CoA ligase<br>(ADP-forming) beta<br>chain (EC 6.2.1.5)         | L3K52_10200                               | L2Y54_RS16995                                   |
| <i>sdhA</i>                                                                             | Succinate<br>dehydrogenase<br>flavoprotein subunit<br>(EC 1.3.99.1)     | L3K52_13210                               | L2Y54_RS12470                                   |
| <i>sdhB</i>                                                                             | Succinate<br>dehydrogenase iron-<br>sulfur protein (EC<br>1.3.99.1)     | L3K52_13215                               | L2Y54_RS12465                                   |
| <i>sdhC</i>                                                                             | Succinate<br>dehydrogenase<br>cytochrome b-556<br>subunit (EC 1.3.99.1) | L3K52_13200                               | L2Y54_RS12480                                   |
| <i>sdhD</i>                                                                             | Succinate<br>dehydrogenase<br>hydrophobic                               | L3K52_13205                               | L2Y54_RS10030                                   |

|                                            |                                                       |                                           |                                                 |
|--------------------------------------------|-------------------------------------------------------|-------------------------------------------|-------------------------------------------------|
|                                            | membrane anchor protein (EC 1.3.5.1)                  |                                           |                                                 |
| <i>fumA</i>                                | Fumarate hydratase class I, aerobic (EC 4.2.1.2)      | L3K52_13100                               | L2Y54_RS12610                                   |
| <i>mgo</i>                                 | Malate:quinone oxidoreductase (EC 1.1.5.4)            | L3K52_16865                               | L2Y54_RS19455                                   |
| <i>pckA</i>                                | Phosphoenolpyruvate carboxykinase (ATP) (EC 4.1.1.49) | L3K52_10325                               | L2Y54_RS16795                                   |
| <i>aspB</i>                                | Aspartate aminotransferase (EC 2.6.1.1)               | L3K52_11185<br>L3K52_15490<br>L3K52_15450 | L2Y54_RS15595<br>L2Y54_RS17995                  |
| <i>gltB</i>                                | Glutamate synthase (NADPH) large chain (EC 1.4.1.13)  | L3K52_15405                               | L2Y54_RS17900                                   |
| <i>gltD</i>                                | Glutamate synthase (NADPH) small chain (EC 1.4.1.13)  | L3K52_15410                               | L2Y54_RS17905                                   |
| <i>aceA</i>                                | Isocitrate lyase (EC 4.1.3.1)                         | L3K52_16860                               | L2Y54_RS19450                                   |
| <i>aceB</i>                                | Malate synthase G (EC 2.3.3.9)                        | L3K52_01335                               | L2Y54_RS06200                                   |
| <i>maeB</i>                                | NADP-dependent malic enzyme (EC 1.1.1.40)             | L3K52_01365                               | L2Y54_RS06165                                   |
| <i>ppc</i>                                 | phosphoenolpyruvate carboxylase (EC 4.1.1.31)         | L3K52_06505                               | L2Y54_RS07775                                   |
| <i>pyc</i>                                 | Pyruvate carboxylase (EC 6.4.1.1)                     | L3K52_11710                               | L2Y54_RS14905                                   |
| <b>Antioxidant protection</b>              |                                                       |                                           |                                                 |
| <i>SOD2</i>                                | Superoxide dismutase [Fe] (EC 1.15.1.1)               | L3K52_00175                               | L2Y54_RS00165                                   |
| <i>CAT2</i>                                | catalase/oxidase HPI (EC 1.11.1.21)                   | L3K52_09360                               | L2Y54_RS11910                                   |
| <i>CAT</i>                                 | Catalase (EC 1.11.1.6)                                | L3K52_07200                               | -                                               |
| <i>ccp</i>                                 | Cytochrome c551 peroxidase (EC 1.11.1.5)              | L3K52_05920<br>L3K52_09275                | L2Y54_RS07160<br>L2Y54_RS11850<br>L2Y54_RS11925 |
| <b>Respiratory Electron Transfer Chain</b> |                                                       |                                           |                                                 |
| <b>Complex 1 NADH-dehydrogenase</b>        |                                                       |                                           |                                                 |
| <i>nuoA</i>                                | NADH ubiquinone oxidoreductase chain A (EC 1.6.5.3)   | L3K52_08960                               | L2Y54_RS11595                                   |

|                                             |                                                                         |                                                          |                                                                  |
|---------------------------------------------|-------------------------------------------------------------------------|----------------------------------------------------------|------------------------------------------------------------------|
| <i>nuoB</i>                                 | NADH-ubiquinone<br>oxidoreductase chain<br>B (EC 1.6.5.3)               | L3K52_08965                                              | L2Y54_RS11600                                                    |
| <i>nuoC</i>                                 | NADH-ubiquinone<br>oxidoreductase chain<br>C (EC 1.6.5.3)               | L3K52_08970                                              | L2Y54_RS11605                                                    |
| <i>nuoD</i>                                 | NADH-ubiquinone<br>oxidoreductase chain<br>D (EC 1.6.5.3)               | L3K52_08975                                              | L2Y54_RS11610                                                    |
| <i>nuoE</i>                                 | NADH-ubiquinone<br>oxidoreductase chain<br>E (EC 1.6.5.3)               | L3K52_08980                                              | L2Y54_RS11615                                                    |
| <i>nuoF</i>                                 | NADH-ubiquinone<br>oxidoreductase chain<br>F (EC 1.6.5.3)               | L3K52_08985                                              | L2Y54_RS11620                                                    |
| <i>nuoG</i>                                 | NADH-ubiquinone<br>oxidoreductase chain<br>G (EC 1.6.5.3)               | L3K52_08990                                              | L2Y54_RS11625                                                    |
| <i>nuoH</i>                                 | NADH-ubiquinone<br>oxidoreductase chain<br>H (EC 1.6.5.3)               | L3K52_08995                                              | L2Y54_RS11630                                                    |
| <i>nuoI</i>                                 | NADH-ubiquinone<br>oxidoreductase chain<br>I (EC 1.6.5.3)               | L3K52_09000                                              | L2Y54_RS11635                                                    |
| <i>nuoJ</i>                                 | NADH-ubiquinone<br>oxidoreductase chain<br>J (EC 1.6.5.3)               | L3K52_09005                                              | L2Y54_RS11640                                                    |
| <i>nuoK</i>                                 | NADH-ubiquinone<br>oxidoreductase chain<br>K (EC 1.6.5.3)               | L3K52_09010                                              | L2Y54_RS11645                                                    |
| <i>nuoL</i>                                 | NADH-ubiquinone<br>oxidoreductase chain<br>L (EC 1.6.5.3)               | L3K52_09015<br>L3K52_01510                               | L2Y54_RS11650                                                    |
| <i>nuoM</i>                                 | NADH-ubiquinone<br>oxidoreductase chain<br>M (EC 1.6.5.3)               | L3K52_09020<br>L3K52_01500<br>L3K52_01515<br>L3K52_01520 | L2Y54_RS11655<br>L2Y54_RS00890<br>L2Y54_RS00915<br>L2Y54_RS00920 |
| <i>nuoN</i>                                 | NADH-ubiquinone<br>oxidoreductase chain<br>N (EC 1.6.5.3)               | L3K52_09025                                              | L2Y54_RS11660                                                    |
| <b>Complex II (succinate dehydrogenase)</b> |                                                                         |                                                          |                                                                  |
| <i>sdhC</i>                                 | Succinate<br>dehydrogenase,<br>cytochrome b556<br>subunit (EC 1.3.99.1) | L3K52_13210                                              | L2Y54_RS12470                                                    |
| <i>sdhD</i>                                 | Succinate<br>dehydrogenase,<br>hydrophobic                              | L3K52_13215                                              | L2Y54_RS12465                                                    |

|                                       |                                                                                  |                            |                                |
|---------------------------------------|----------------------------------------------------------------------------------|----------------------------|--------------------------------|
|                                       | membrane anchor protein (EC 1.3.5.1)                                             |                            |                                |
| <i>sdhA</i>                           | Succinate dehydrogenase flavoprotein subunit (EC 1.3.99.1)                       | L3K52_13200                | L2Y54_RS12480                  |
| <i>sdhB</i>                           | Succinate dehydrogenase iron-sulfur protein (EC 1.3.99.1)                        | L3K52_13205                | L2Y54_RS10030                  |
| <b>Complex III</b>                    |                                                                                  |                            |                                |
| <i>cytB</i>                           | ubiquinol-cytochrome c reductase cytochrome b subunit (EC 7.1.1.8)               | L3K52_16505                | L2Y54_RS19170                  |
| <i>cyc1</i>                           | ubiquinol-cytochrome c reductase cytochrome c1 subunit (EC 7.1.1.8)              | L3K52_16500                | L2Y54_RS19165                  |
| <i>rip1</i><br>( <i>ISP</i> )         | ubiquinol-cytochrome c reductase iron-sulfur subunit (EC 7.1.1.8)                | L3K52_16510<br>L3K52_10880 | L2Y54_RS15965<br>L2Y54_RS19175 |
| <b>Complex IV (terminal oxydases)</b> |                                                                                  |                            |                                |
| <i>cyoE</i>                           | Heme A synthase, cytochrome oxidase biogenesis protein Cox15-CtaA (EC 2.5.1.141) | L3K52_00155                | L2Y54_RS00145                  |
| <i>cox11</i>                          | cytochrome c oxidase assembly protein subunit 11 (EC 7.1.1.9)                    | L3K52_00125                | L2Y54_RS00115                  |
| <i>cox15</i>                          | cytochrome c oxidase assembly protein subunit 15 (EC 7.1.1.9)                    | L3K52_00100<br>L3K52_00155 | L2Y54_RS00085                  |
| <i>coxB</i>                           | cytochrome c oxidase subunit II (EC 7.1.1.9)                                     | L3K52_00115                | L2Y54_RS00100                  |
| <i>coxA</i>                           | cytochrome c oxidase subunit I (EC 7.1.1.9)                                      | L3K52_00120                | L2Y54_RS00105                  |
| <i>coxC</i>                           | cytochrome c oxidase subunit III (EC 7.1.1.9)                                    | L3K52_00130                | L2Y54_RS00120                  |

|                                |                                                                                 |             |                                |
|--------------------------------|---------------------------------------------------------------------------------|-------------|--------------------------------|
| <i>coxD</i>                    | cytochrome c oxidase subunit IV (EC 7.1.1.9)                                    | -           | L2Y54_RS20060                  |
| <i>cydA</i>                    | Cytochrome d ubiquinol oxidase subunit I (EC 7.1.1.7)                           | L3K52_15575 | -                              |
| <i>cydB</i>                    | Cytochrome d ubiquinol oxidase subunit II (EC 7.1.1.7)                          | L3K52_15570 | -                              |
| <i>cydC</i>                    | Transport ATP-binding protein CydC                                              | L3K52_15555 | -                              |
| <i>cydD</i>                    | Transport ATP-binding protein CydD                                              | L3K52_15560 | -                              |
| <i>ccoN</i>                    | cytochrome c oxidase cbb3-type subunit I (EC 1.9.3.1)                           | L3K52_14130 | L2Y54_RS16310<br>L2Y54_RS19630 |
| <i>ccoO</i>                    | cytochrome c oxidase cbb3-type subunit II (EC 7.1.1.9)                          | L3K52_14125 | L2Y54_RS16305<br>L2Y54_RS19625 |
| <i>ccoP</i>                    | cytochrome c oxidase cbb3-type subunit III (EC 7.1.1.9)                         | L3K52_14115 | L2Y54_RS16295<br>L2Y54_RS19615 |
| <i>ccoG</i><br>( <i>FixG</i> ) | Type cbb3 cytochrome oxidase biogenesis protein CcoG, involved in Cu oxidation  | L3K52_14635 | L2Y54_RS19610<br>L2Y54_RS17630 |
| <i>ccoQ</i>                    | CcoQ/FixQ family Cbb3-type cytochrome c oxidase assembly chaperone (EC 1.9.3.1) | -           | L2Y54_RS19620                  |
| <i>ccoS</i>                    | cbb3-type cytochrome oxidase assembly protein CcoS                              | L3K52_14620 | L2Y54_RS17615                  |
| <b>ATPase</b>                  |                                                                                 |             |                                |
| <i>atpA</i>                    | F-type H <sup>+</sup> -transporting ATPase subunit alpha (EC 7.1.2.2)           | L3K52_00430 | L2Y54_RS00385<br>L2Y54_RS09295 |
| <i>atpD</i>                    | F-type H <sup>+</sup> -transporting ATPase subunit beta (EC 7.1.2.2)            | L3K52_00420 | L2Y54_RS00375                  |
| <i>atpH</i>                    | F-type H <sup>+</sup> -transporting ATPase                                      | L3K52_00435 | L2Y54_RS00390                  |

|             |                                                                         |             |               |
|-------------|-------------------------------------------------------------------------|-------------|---------------|
|             | subunit delta (EC 7.1.2.2)                                              |             |               |
| <i>atpC</i> | F-type H <sup>+</sup> -transporting ATPase subunit epsilon (EC 7.1.2.2) | L3K52_00415 | L2Y54_RS00370 |
| <i>atpG</i> | F-type H <sup>+</sup> -transporting ATPase subunit gamma (EC 7.1.2.2)   | L3K52_00425 | L2Y54_RS00380 |
| <i>atpB</i> | F-type H <sup>+</sup> -transporting ATPase subunit a (EC 7.1.2.2)       | L3K52_00450 | L2Y54_RS00405 |
| <i>atpF</i> | F-type H <sup>+</sup> -transporting ATPase subunit b (EC 7.1.2.2)       | L3K52_00440 | L2Y54_RS00395 |
| <i>atpE</i> | ATP synthase F <sub>0</sub> sector subunit c (EC 7.1.2.2)               | L3K52_00445 | L2Y54_RS00400 |
